# Supplementary material for: Selection of Reference Gene for Expression Studies in the Ovary and Pituitary of Spotted Scat (Scatophagus argus) at Different Ovarian Stages
Source: MDPI journal article supplement (doi:10.3390/fishes8020120), 2023-02-20
Supplement: s1 [file s1]

Supplementary:

Supplementary Figure S1. The melting curves of the cDNA samples amplified with candidate genes in ovary.

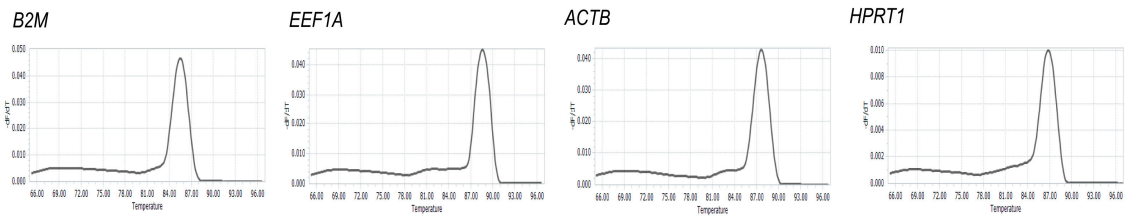

Supplementary Figure S2. The melting curves of the cDNA samples amplified with candidate genes in pituitary.

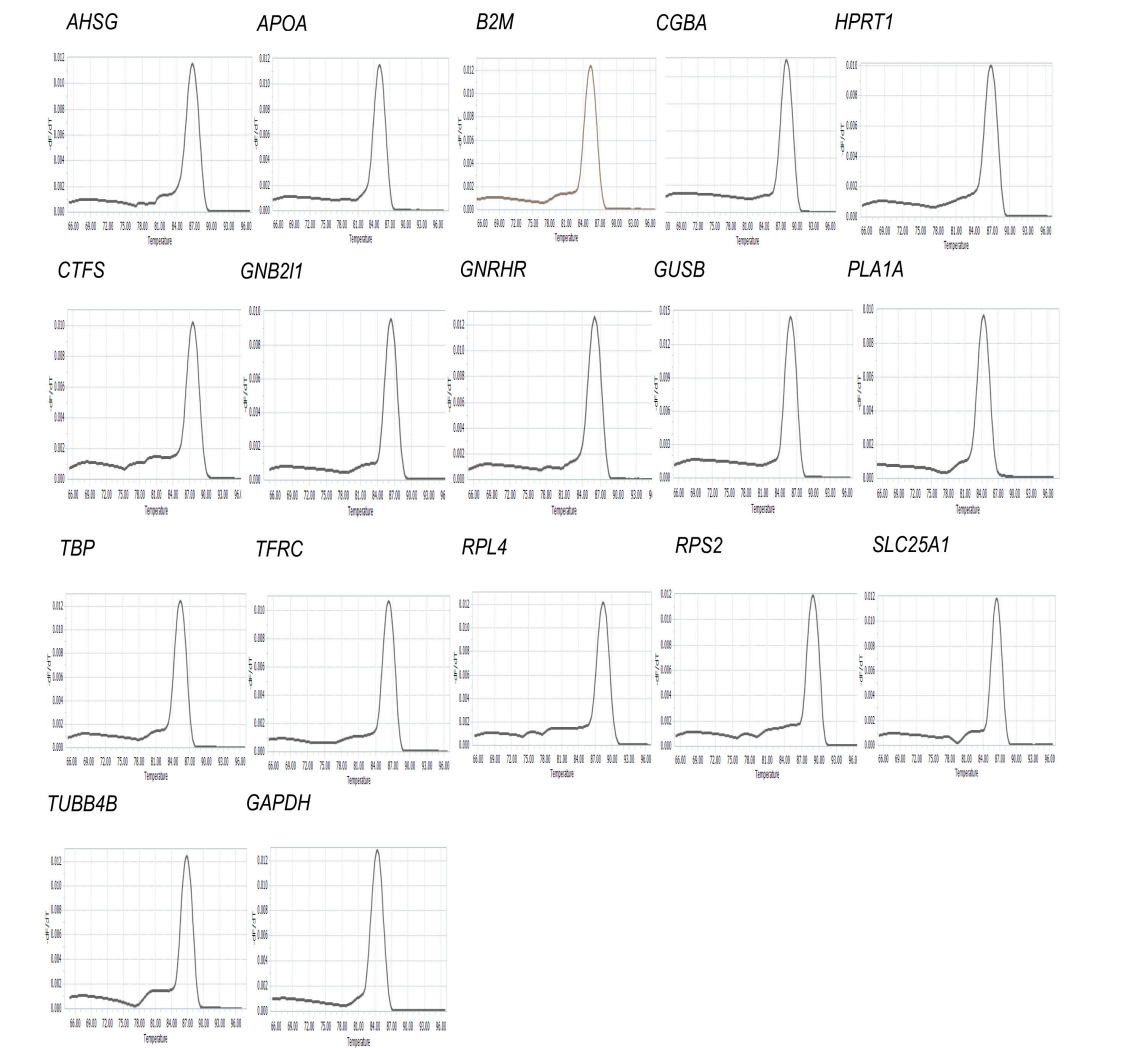

Table S1. Ovarian stages of the 20 female spotted scat

| Ovarian stages | Fish numbers | Fish IDs                              |
|----------------|--------------|---------------------------------------|
| Stage II       | 6            | A3,A7,A9,A12,A17,A20                  |
| Stage III      | 3            | A13A15,A18                            |
| StageIV        | 11           | A1,A2,A4,A5,A6,A8,A10,A11,A14,A16,A19 |

Table S2. Expression stability analysis of each candidate reference gene in the ovary based on five softwares.

| tissues | Stages     | Rank | GeNorm |           | NormFinder |           | $\Delta$ Ct |           | BestKeeper |           | Comprehensive Ranking |           |
|---------|------------|------|--------|-----------|------------|-----------|-------------|-----------|------------|-----------|-----------------------|-----------|
|         |            |      | gene   | stability | gene       | stability | gene        | stability | gene       | stability | gene                  | stability |
| Ovary   | Stage II   | 1    | EEF1A  | 0.694     | EEF1A      | 0.347     | EEF1A       | 0.77      | ACTB       | 0.63      | EEF1A                 | 1.19      |
|         |            | 2    | HPRT1  | 0.694     | HPRT1      | 0.702     | HPRT1       | 1.01      | EEF1A      | 0.73      | HPRT1                 | 1.73      |
|         |            | 3    | ACTB   | 0.839     | ACTB       | 0.915     | ACTB        | 1.1       | HPRT1      | 0.81      | B2M                   | 2.45      |
|         |            | 4    | B2M    | 1.019     | B2M        | 1.07      | B2M         | 1.2       | B2M        | 1.17      | ACTB                  | 4         |
|         | Stage III  | 1    | ACTB   | 0.245     | ACTB       | 0.123     | ACTB        | 0.35      | HPRT1      | 0.71      | EEF1A                 | 1.41      |
|         |            | 2    | HPRT1  | 0.245     | HPRT1      | 0.177     | HPRT1       | 0.4       | EEF1A      | 0.75      | B2M                   | 1.73      |
|         |            | 3    | EEF1A  | 0.25      | EEF1A      | 0.344     | EEF1A       | 0.44      | ACTB       | 0.87      | HPRT1                 | 2.06      |
|         |            | 4    | B2M    | 0.473     | B2M        | 0.68      | B2M         | 0.7       | B2M        | 1.22      | ACTB                  | 4         |
|         | Stage IV   | 1    | EEF1A  | 0.42      | EEF1A      | 0.073     | EEF1A       | 0.62      | B2M        | 0.64      | EEF1A                 | 1.57      |
|         |            | 2    | HPRT1  | 0.42      | HPRT1      | 0.334     | HPRT1       | 0.68      | HPRT1      | 0.75      | HPRT1                 | 1.73      |
|         |            | 3    | ACTB   | 0.561     | ACTB       | 0.615     | ACTB        | 0.79      | EEF1A      | 0.89      | B2M                   | 1.86      |
|         |            | 4    | B2M    | 0.764     | B2M        | 0.884     | B2M         | 0.97      | ACTB       | 1.11      | ACTB                  | 4         |
|         | All stages | 1    | EEF1A  | 0.604     | HPRT1      | 0.19      | HPRT1       | 0.91      | B2M        | 1.01      | EEF1A                 | 1.57      |
|         |            | 2    | HPRT1  | 0.604     | EEF1A      | 0.446     | EEF1A       | 0.92      | HPRT1      | 1.62      | HPRT1                 | 1.73      |
|         |            | 3    | ACTB   | 0.679     | ACTB       | 0.685     | ACTB        | 1.01      | ACTB       | 1.85      | B2M                   | 1.86      |
|         |            | 4    | B2M    | 1.083     | B2M        | 1.411     | B2M         | 1.49      | EEF1A      | 1.96      | ACTB                  | 4         |

Table S3. Expression stability analysis of each candidate reference gene in the pituitary based on five softwares.

| tissues   | Stages   | Rank | GeNorm |           | NormFinder |           | $\Delta$ Ct |           | BestKeeper |           | Comprehensive Ranking |           |
|-----------|----------|------|--------|-----------|------------|-----------|-------------|-----------|------------|-----------|-----------------------|-----------|
|           |          |      | gene   | stability | gene       | stability | gene        | stability | gene       | stability | gene                  | stability |
| Pituitary | Stage II | 1    | TUBB4B | 0.155     | TBP        | 0.174     | RPL4        | 0.81      | GNB211     | 0.14      | GNB211                | 2.34      |
|           |          | 2    | GAPDH  | 0.155     | GNB211     | 0.265     | PLA1A       | 0.82      | PLA1A      | 0.15      | RPL4                  | 2.78      |
|           |          | 3    | PLA1A  | 0.177     | CTFS       | 0.272     | GNB211      | 0.82      | RPL4       | 0.19      | PLA                   | 3.13      |
|           |          | 4    | RPL4   | 0.199     | RPS2       | 0.297     | GAPDH       | 0.83      | RPLP0      | 0.24      | GAPDH                 | 3.31      |
|           |          | 5    | GNB211 | 0.254     | RPL4       | 0.309     | TUBB4B      | 0.83      | GAPDH      | 0.24      | TUBB4B                | 3.96      |
|           |          | 6    | CTFS   | 0.305     | GAPDH      | 0.32      | TBP         | 0.83      | TUBB4B     | 0.27      | TBP                   | 4.41      |
|           |          | 7    | TBP    | 0.334     | TUBB4B     | 0.322     | CTFS        | 0.85      | CTFS       | 0.27      | CTFS                  | 5.24      |
|           |          | 8    | RPS2   | 0.35      | PLA1A      | 0.36      | RPS2        | 0.85      | RPS2       | 0.28      | RPS2                  | 6.73      |

|            |    |         |       |         |       |         |      |         |      |         |       |
|------------|----|---------|-------|---------|-------|---------|------|---------|------|---------|-------|
|            | 9  | RPLP0   | 0.393 | TFRC    | 0.487 | RPLP0   | 0.97 | TBP     | 0.33 | RPLP0   | 7.73  |
|            | 10 | B2M     | 0.437 | APOA1   | 0.527 | B2M     | 1.01 | B2M     | 0.42 | B2M     | 10.47 |
|            | 11 | APOA1   | 0.49  | RPLP0   | 0.585 | TFRC    | 1.03 | APOA1   | 0.54 | APOA1   | 10.98 |
|            | 12 | TFRC    | 0.543 | B2M     | 0.595 | APOA1   | 1.03 | GUSB    | 0.57 | TFRC    | 11.15 |
|            | 13 | GUSB    | 0.587 | GUSB    | 0.625 | GUSB    | 1.07 | TFRC    | 0.62 | GUSB    | 12.74 |
|            | 14 | HPRT1   | 0.666 | HPRT1   | 1.246 | HPRT1   | 1.44 | HPRT1   | 0.85 | HPRT1   | 14    |
|            | 15 | SLC25A1 | 0.804 | SLC25A1 | 1.561 | SLC25A1 | 1.77 | SLC25A1 | 1.24 | SLC25A1 | 15    |
|            | 16 | GNRHR   | 0.996 | GNRHR   | 2.321 | GNRHR   | 2.42 | GNRHR   | 1.51 | GNRHR   | 16    |
|            | 17 | CGBA    | 1.166 | CGBA    | 2.324 | CGBA    | 2.44 | CGBA    | 1.63 | CGBA    | 17    |
| Stage III  | 1  | GNB211  | 0.16  | GAPDH   | 0.06  | TUBB4B  | 0.72 | RPL4    | 0.14 | RPL4    | 2.45  |
|            | 2  | PLA1A   | 0.16  | TUBB4B  | 0.097 | GAPDH   | 0.73 | GNB211  | 0.2  | TUBB4B  | 2.91  |
|            | 3  | RPL4    | 0.216 | RPS2    | 0.225 | RPL4    | 0.75 | B2M     | 0.2  | GNB211  | 3.08  |
|            | 4  | TBP     | 0.308 | RPL4    | 0.308 | RPS2    | 0.77 | TBP     | 0.2  | GAPDH   | 3.15  |
|            | 5  | B2M     | 0.336 | SLC25A1 | 0.51  | GNB211  | 0.83 | PLA1A   | 0.31 | PLA     | 3.81  |
|            | 6  | TUBB4B  | 0.427 | GNB211  | 0.554 | PLA1A   | 0.85 | TUBB4B  | 0.42 | RPS2    | 5.26  |
|            | 7  | GAPDH   | 0.501 | PLA1A   | 0.577 | SLC25A1 | 0.85 | RPS2    | 0.44 | TBP     | 5.3   |
|            | 8  | RPS2    | 0.534 | GUSB    | 0.595 | GUSB    | 0.9  | GAPDH   | 0.44 | B2M     | 6.51  |
|            | 9  | SLC25A1 | 0.58  | B2M     | 0.732 | TBP     | 0.94 | CGBA    | 0.46 | SLC25A1 | 7.67  |
|            | 10 | CGBA    | 0.628 | CGBA    | 0.737 | B2M     | 0.95 | RPLP0   | 0.59 | GUSB    | 9.78  |
|            | 11 | GUSB    | 0.672 | TBP     | 0.741 | CTFS    | 1.01 | SLC25A1 | 0.64 | CGBA    | 10.19 |
|            | 12 | CTFS    | 0.722 | CTFS    | 0.771 | CGBA    | 1.02 | GNRHR   | 0.75 | CTFS    | 12.2  |
|            | 13 | GNRHR   | 0.768 | APOA1   | 0.85  | APOA1   | 1.07 | GUSB    | 0.76 | GNRHR   | 13.69 |
|            | 14 | APOA1   | 0.813 | HPRT1   | 0.972 | HPRT1   | 1.14 | CTFS    | 0.84 | APOA1   | 13.73 |
|            | 15 | HPRT1   | 0.851 | GNRHR   | 0.995 | GNRHR   | 1.17 | APOA1   | 0.86 | RPLP0   | 14.23 |
|            | 16 | RPLP0   | 0.896 | RPLP0   | 1.197 | RPLP0   | 1.29 | HPRT1   | 1    | HPRT1   | 14.73 |
|            | 17 | TFRC    | 0.973 | TFRC    | 1.465 | TFRC    | 1.55 | TFRC    | 1.26 | TFRC    | 17    |
| Stage IV   | 1  | RPL4    | 0.273 | GNB211  | 0.346 | RPL4    | 0.83 | RPL4    | 0.19 | RPL4    | 1.32  |
|            | 2  | TUBB4B  | 0.273 | RPS2    | 0.35  | GNB211  | 0.85 | GNB211  | 0.2  | GNB211  | 2     |
|            | 3  | PLA1A   | 0.308 | RPL4    | 0.354 | RPS2    | 0.86 | GAPDH   | 0.28 | RPS2    | 3.46  |
|            | 4  | GNB211  | 0.336 | PLA1A   | 0.422 | PLA1A   | 0.86 | RPS2    | 0.3  | TUBB4B  | 3.94  |
|            | 5  | GAPDH   | 0.357 | RPLP0   | 0.432 | TUBB4B  | 0.89 | B2M     | 0.31 | PLA     | 4.28  |
|            | 6  | RPS2    | 0.377 | CGBA    | 0.478 | TBP     | 0.89 | TUBB4B  | 0.35 | GAPDH   | 5.54  |
|            | 7  | TBP     | 0.392 | TBP     | 0.518 | GAPDH   | 0.91 | PLA1A   | 0.37 | TBP     | 7.17  |
|            | 8  | B2M     | 0.428 | TUBB4B  | 0.526 | B2M     | 0.96 | APOA1   | 0.49 | B2M     | 7.52  |
|            | 9  | APOA1   | 0.474 | GAPDH   | 0.529 | CGBA    | 0.99 | TBP     | 0.53 | RPLP0   | 8.8   |
|            | 10 | CTFS    | 0.51  | B2M     | 0.566 | RPLP0   | 0.99 | RPLP0   | 0.54 | CGBA    | 9.19  |
|            | 11 | CGBA    | 0.547 | APOA1   | 0.642 | APOA1   | 1.01 | CTFS    | 0.62 | APOA1   | 9.66  |
|            | 12 | RPLP0   | 0.579 | CTFS    | 0.742 | CTFS    | 1.04 | CGBA    | 0.71 | CTFS    | 11.22 |
|            | 13 | GUSB    | 0.635 | GUSB    | 0.789 | GUSB    | 1.17 | GUSB    | 0.84 | GUSB    | 13    |
|            | 14 | TFRC    | 0.737 | TFRC    | 1.111 | TFRC    | 1.46 | TFRC    | 0.99 | TFRC    | 14    |
|            | 15 | HPRT1   | 0.823 | HPRT1   | 1.337 | HPRT1   | 1.57 | HPRT1   | 1.18 | HPRT1   | 15    |
|            | 16 | SLC25A1 | 0.971 | SLC25A1 | 1.757 | SLC25A1 | 1.96 | SLC25A1 | 1.31 | SLC25A1 | 16    |
|            | 17 | GNRHR   | 1.172 | GNRHR   | 2.599 | GNRHR   | 2.68 | GNRHR   | 2    | GNRHR   | 17    |
| All stages | 1  | RPL4    | 0.247 | RPL4    | 0.248 | GNB211  | 0.2  | GNB211  | 0.2  | RPL4    | 1.19  |
|            | 2  | GNB211  | 0.247 | RPS2    | 0.294 | RPL4    | 0.21 | RPL4    | 0.21 | GNB211  | 1.57  |
|            | 3  | PLA1A   | 0.294 | GNB211  | 0.353 | GAPDH   | 0.3  | B2M     | 0.33 | RPS2    | 3.66  |
|            | 4  | TUBB4B  | 0.325 | PLA1A   | 0.398 | PLA1A   | 0.32 | GAPDH   | 0.3  | PLA     | 4.36  |
|            | 5  | GAPDH   | 0.35  | TUBB4B  | 0.399 | RPS2    | 0.32 | RPS2    | 0.32 | TUBB4B  | 4.6   |
|            | 6  | RPS2    | 0.381 | GAPDH   | 0.4   | B2M     | 0.33 | PLA1A   | 0.32 | GAPDH   | 4.61  |
|            | 7  | TBP     | 0.429 | B2M     | 0.587 | TUBB4B  | 0.37 | TUBB4B  | 0.37 | B2M     | 6.96  |
|            | 8  | B2M     | 0.463 | CTFS    | 0.588 | RPLP0   | 0.51 | RPLP0   | 0.51 | TBP     | 8.18  |
|            | 9  | CTFS    | 0.506 | TBP     | 0.593 | CTFS    | 0.54 | CTFS    | 0.54 | CTFS    | 9     |
|            | 10 | RPLP0   | 0.552 | APOA1   | 0.622 | TBP     | 0.55 | TBP     | 0.55 | RPLP0   | 9.46  |
|            | 11 | APOA1   | 0.595 | RPLP0   | 0.662 | APOA1   | 0.67 | APOA1   | 0.67 | APOA1   | 11    |
|            | 12 | GUSB    | 0.658 | GUSB    | 0.799 | GUSB    | 0.78 | GUSB    | 0.78 | GUSB    | 12    |
|            | 13 | TFRC    | 0.747 | TFRC    | 1.053 | TFRC    | 0.93 | TFRC    | 0.93 | TFRC    | 13    |
|            | 14 | HPRT1   | 0.871 | HPRT1   | 1.52  | HPRT1   | 1.31 | SLC25A1 | 1.41 | HPRT1   | 14    |

|         |            | 15   | SLC25A1 | 1.009     | SLC25A1    | 1.748     | SLC25A1     | 1.41      | HPRT1      | 1.31      | SLC25A1               | 15        |
|---------|------------|------|---------|-----------|------------|-----------|-------------|-----------|------------|-----------|-----------------------|-----------|
|         |            | 16   | GNRHR   | 1.165     | GNRHR      | 2.145     | CGBA        | 1.67      | GNRHR      | 1.82      | CGBA                  | 16        |
|         |            | 17   | CGBA    | 1.302     | CGBA       | 2.164     | GNRHR       | 1.82      | CGBA       | 1.67      | GNRHR                 | 17        |
| tissues | Stages     | Rank | GeNorm  |           | NormFinder |           | $\Delta Ct$ |           | BestKeeper |           | Comprehensive Ranking |           |
|         |            |      | gene    | stability | gene       | stability | gene        | stability | gene       | stability | gene                  | stability |
| Ovary   | Stage II   | 1    | EEF1A   | 0.694     | EEF1A      | 0.347     | EEF1A       | 0.77      | ACTB       | 0.63      | EEF1A                 | 1.19      |
|         |            | 2    | HPRT1   | 0.694     | HPRT1      | 0.702     | HPRT1       | 1.01      | EEF1A      | 0.73      | HPRT1                 | 1.73      |
|         |            | 3    | ACTB    | 0.839     | ACTB       | 0.915     | ACTB        | 1.1       | HPRT1      | 0.81      | B2M                   | 2.45      |
|         |            | 4    | B2M     | 1.019     | B2M        | 1.07      | B2M         | 1.2       | B2M        | 1.17      | ACTB                  | 4         |
|         | Stage III  | 1    | ACTB    | 0.245     | ACTB       | 0.123     | ACTB        | 0.35      | HPRT1      | 0.71      | EEF1A                 | 1.41      |
|         |            | 2    | HPRT1   | 0.245     | HPRT1      | 0.177     | HPRT1       | 0.4       | EEF1A      | 0.75      | B2M                   | 1.73      |
|         |            | 3    | EEF1A   | 0.25      | EEF1A      | 0.344     | EEF1A       | 0.44      | ACTB       | 0.87      | HPRT1                 | 2.06      |
|         |            | 4    | B2M     | 0.473     | B2M        | 0.68      | B2M         | 0.7       | B2M        | 1.22      | ACTB                  | 4         |
|         | Stage IV   | 1    | EEF1A   | 0.42      | EEF1A      | 0.073     | EEF1A       | 0.62      | B2M        | 0.64      | EEF1A                 | 1.57      |
|         |            | 2    | HPRT1   | 0.42      | HPRT1      | 0.334     | HPRT1       | 0.68      | HPRT1      | 0.75      | HPRT1                 | 1.73      |
|         |            | 3    | ACTB    | 0.561     | ACTB       | 0.615     | ACTB        | 0.79      | EEF1A      | 0.89      | B2M                   | 1.86      |
|         |            | 4    | B2M     | 0.764     | B2M        | 0.884     | B2M         | 0.97      | ACTB       | 1.11      | ACTB                  | 4         |
|         | All stages | 1    | EEF1A   | 0.604     | HPRT1      | 0.19      | HPRT1       | 0.91      | B2M        | 1.01      | EEF1A                 | 1.57      |
|         |            | 2    | HPRT1   | 0.604     | EEF1A      | 0.446     | EEF1A       | 0.92      | HPRT1      | 1.62      | HPRT1                 | 1.73      |
|         |            | 3    | ACTB    | 0.679     | ACTB       | 0.685     | ACTB        | 1.01      | ACTB       | 1.85      | B2M                   | 1.86      |
|         |            | 4    | B2M     | 1.083     | B2M        | 1.411     | B2M         | 1.49      | EEF1A      | 1.96      | ACTB                  | 4         |
